# Supplementary material
Source: PubMed Central journal article supplement (PMC10408268)
Supplement: jamanetwopen-e2252371-s001.pdf [file jamanetwopen-e2252371-s001.pdf]

## Supplementary Online Content

Zeinomar N, Qin B, Amin S, et al. Association of cigarette smoking and alcohol consumption with subsequent mortality among Black breast cancer survivors in New Jersey. *JAMA Netw Open*. 2023;6(1):e2252371.  
doi:10.1001/jamanetworkopen.2022.52371

**eTable 1.** Hazard Ratios and 95% Confidence Intervals for Associations of Cigarette Smoking and Mortality After First Breast Cancer in the Women’s Circle of Health Follow-up Study (WCHFS), Excluding Stage IV Tumors

**eTable 2.** Hazard Ratios and 95% Confidence Intervals for Associations of Cigarette Smoking and Mortality After First Breast Cancer in the Women’s Circle Of Health Follow-up Study (WCHFS), Excluding Ductal Carcinoma In-Situ

This supplementary material has been provided by the authors to give readers additional information about their work.

**eTable 1.** Hazard Ratios and 95% Confidence Intervals for Associations of Cigarette Smoking and Mortality After First Breast Cancer in the Women’s Circle of Health Follow-up Study (WCHFS), Excluding Stage IV Tumors

|                                                                                                                                                                                                                                                                                                                                               | All-cause mortality |              |                   | Breast cancer–specific mortality |                      |                   |
|-----------------------------------------------------------------------------------------------------------------------------------------------------------------------------------------------------------------------------------------------------------------------------------------------------------------------------------------------|---------------------|--------------|-------------------|----------------------------------|----------------------|-------------------|
|                                                                                                                                                                                                                                                                                                                                               | Person-years        | Total deaths | HR (95% CI)       | Person-years                     | Breast cancer deaths | HR (95% CI)       |
| <b>Smoking Status <sup>a</sup></b>                                                                                                                                                                                                                                                                                                            |                     |              |                   |                                  |                      |                   |
| Never smokers                                                                                                                                                                                                                                                                                                                                 | 7796.7              | 147          | Reference         | 7796.7                           | 85                   | Reference         |
| Former smokers                                                                                                                                                                                                                                                                                                                                | 3228                | 76           | 1.30 (0.97, 1.73) | 3228                             | 37                   | 1.35 (0.88, 2.07) |
| Current smokers                                                                                                                                                                                                                                                                                                                               | 2033.4              | 70           | 1.58 (1.17, 2.13) | 2033.4                           | 36                   | 1.38 (0.92, 2.08) |
| <b>Pack years of smoking <sup>a</sup></b>                                                                                                                                                                                                                                                                                                     |                     |              |                   |                                  |                      |                   |
| Never smokers                                                                                                                                                                                                                                                                                                                                 | 7796.7              | 147          | Reference         | 7796.7                           | 85                   | Reference         |
| Former smokers, < 10 pack years                                                                                                                                                                                                                                                                                                               | 1924.5              | 43           | 1.20 (0.85, 1.70) | 1951.2                           | 23                   | 1.30 (0.79, 2.14) |
| Former smokers, ≥ 10 pack years                                                                                                                                                                                                                                                                                                               | 1303.4              | 33           | 1.47 (0.99, 2.18) | 1310.3                           | 14                   | 1.45 (0.78, 2.72) |
| Current smokers, < 10 pack years                                                                                                                                                                                                                                                                                                              | 864.6               | 19           | 0.99 (0.61, 1.62) | 886.4                            | 13                   | 1.09 (0.61, 1.96) |
| Current smokers, ≥ 10 pack years                                                                                                                                                                                                                                                                                                              | 1168.8              | 51           | 2.02 (1.44, 2.82) | 1207.8                           | 23                   | 1.62 (0.98, 2.68) |
| <b>Duration of smoking <sup>a</sup></b>                                                                                                                                                                                                                                                                                                       |                     |              |                   |                                  |                      |                   |
| Never smokers                                                                                                                                                                                                                                                                                                                                 | 7796.7              | 168          | Reference         | 7796.7                           | 85                   | Reference         |
| Former smokers, < 25 years                                                                                                                                                                                                                                                                                                                    | 2222.2              | 43           | 1.09 (0.77, 1.55) | 2222.2                           | 21                   | 1.09 (0.65, 1.84) |
| Former smokers, ≥ 25 years                                                                                                                                                                                                                                                                                                                    | 1005.8              | 33           | 1.77 (1.19, 2.65) | 1005.8                           | 16                   | 2.11 (1.16, 3.83) |
| Current smokers, < 25 years                                                                                                                                                                                                                                                                                                                   | 416                 | 13           | 1.41 (0.78, 2.55) | 416                              | 8                    | 1.14 (0.57, 2.29) |
| Current smokers, ≥ 25 years                                                                                                                                                                                                                                                                                                                   | 1617.4              | 57           | 1.64 (1.19, 2.26) | 1617.4                           | 28                   | 1.50 (0.94, 2.38) |
| <b>Intensity of Smoking <sup>a</sup></b>                                                                                                                                                                                                                                                                                                      |                     |              |                   |                                  |                      |                   |
| Never smokers                                                                                                                                                                                                                                                                                                                                 | 7796.7              | 147          | Reference         | 7796.7                           | 85                   | Reference         |
| Former smokers, < 8 cigarettes/day                                                                                                                                                                                                                                                                                                            | 1556.7              | 35           | 1.21 (0.83, 1.77) | 1556.7                           | 18                   | 1.32 (0.77, 2.27) |
| Former smokers, ≥ 8 cigarettes/day                                                                                                                                                                                                                                                                                                            | 1671.2              | 41           | 1.37 (0.96, 1.96) | 1671.2                           | 19                   | 1.38 (0.80, 2.39) |
| Current smokers, < 8 cigarettes/day                                                                                                                                                                                                                                                                                                           | 964.4               | 27           | 1.31 (0.85, 2.01) | 964.4                            | 17                   | 1.40 (0.82, 2.42) |
| Current smokers, ≥ 8 cigarettes/day                                                                                                                                                                                                                                                                                                           | 1069.1              | 43           | 1.80 (1.26, 2.57) | 1069.1                           | 19                   | 1.36 (0.79, 2.32) |
| <b>Recency of cessation <sup>b</sup></b>                                                                                                                                                                                                                                                                                                      |                     |              |                   |                                  |                      |                   |
| Never smokers                                                                                                                                                                                                                                                                                                                                 | 6787                | 118          | Reference         | 6787                             | 67                   | Reference         |
| Current smokers                                                                                                                                                                                                                                                                                                                               | 1792.7              | 59           | 1.63 (1.19, 2.25) | 1792.7                           | 28                   | 1.33 (0.83, 2.11) |
| Former smokers, ≤10 years                                                                                                                                                                                                                                                                                                                     | 849.2               | 21           | 1.39 (0.87, 2.23) | 849.2                            | 10                   | 1.39 (0.67, 2.89) |
| Former smokers, >10 years                                                                                                                                                                                                                                                                                                                     | 1860.7              | 41           | 1.22 (0.85, 1.76) | 1860.7                           | 21                   | 1.37 (0.81, 2.33) |
| HR = Hazard Ratio, 95% CI = 95% Confidence Interval                                                                                                                                                                                                                                                                                           |                     |              |                   |                                  |                      |                   |
| <sup>a</sup> Cox-proportional hazard models adjusted for age at diagnosis, tumor stage, body mass index (BMI), alcohol consumption, education, household income, marital status, menopausal status, and physical activity. Competing risk models (Fine and Gray subdistribution hazard model) were used for breast cancer-specific mortality. |                     |              |                   |                                  |                      |                   |

<sup>b</sup> Cox-proportional hazard models adjusted for age at diagnosis, tumor stage, waist to hip ratio, history of diabetes, history of hypertension, education, household income, and physical activity. Competing risk models (Fine and Gray subdistribution hazard model) were used for breast cancer-specific mortality

**eTable 2.** Hazard Ratios and 95% Confidence Intervals for Associations of Cigarette Smoking and Mortality After First Breast Cancer in the Women’s Circle Of Health Follow-up Study (WCHFS), Excluding Ductal Carcinoma In-Situ

|                                                                                                                                                                                                                                                                                                                                               | All-cause mortality |              |                   | Breast cancer–specific mortality |                      |                   |
|-----------------------------------------------------------------------------------------------------------------------------------------------------------------------------------------------------------------------------------------------------------------------------------------------------------------------------------------------|---------------------|--------------|-------------------|----------------------------------|----------------------|-------------------|
|                                                                                                                                                                                                                                                                                                                                               | Person-years        | Total deaths | HR (95% CI)       | Person-years                     | Breast cancer deaths | HR (95% CI)       |
| <b>Smoking Status<sup>a</sup></b>                                                                                                                                                                                                                                                                                                             |                     |              |                   |                                  |                      |                   |
| Never smokers                                                                                                                                                                                                                                                                                                                                 | 6371.3              | 160          | Reference         | 6371.3                           | 101                  | Reference         |
| Former smokers                                                                                                                                                                                                                                                                                                                                | 2463.5              | 74           | 1.24 (0.93, 1.65) | 2463.5                           | 40                   | 1.20 (0.81, 1.80) |
| Current smokers                                                                                                                                                                                                                                                                                                                               | 1789.9              | 78           | 1.55 (1.16, 2.07) | 1789.9                           | 42                   | 1.28 (0.88, 1.88) |
| <b>Pack years of smoking<sup>a</sup></b>                                                                                                                                                                                                                                                                                                      |                     |              |                   |                                  |                      |                   |
| Never smokers                                                                                                                                                                                                                                                                                                                                 | 6371.3              | 160          | Reference         | 6371.3                           | 101                  | Reference         |
| Former smokers, < 10 pack years                                                                                                                                                                                                                                                                                                               | 1455.7              | 45           | 1.20 (0.85, 1.68) | 1455.7                           | 26                   | 1.18 (0.75, 1.86) |
| Former smokers, ≥ 10 pack years                                                                                                                                                                                                                                                                                                               | 1007.8              | 29           | 1.33 (0.88, 2.01) | 1007.8                           | 14                   | 1.26 (0.68, 2.35) |
| Current smokers, < 10 pack years                                                                                                                                                                                                                                                                                                              | 775.2               | 23           | 1.11 (0.71, 1.75) | 775.2                            | 15                   | 1.08 (0.63, 1.84) |
| Current smokers, ≥ 10 pack years                                                                                                                                                                                                                                                                                                              | 1014.7              | 55           | 1.85 (1.34, 2.56) | 1014.7                           | 27                   | 1.43 (0.89, 2.29) |
| <b>Duration of smoking<sup>a</sup></b>                                                                                                                                                                                                                                                                                                        |                     |              |                   |                                  |                      |                   |
| Never smokers                                                                                                                                                                                                                                                                                                                                 | 6371.3              | 160          | Reference         | 6371.3                           | 101                  | Reference         |
| Former smokers, < 25 years                                                                                                                                                                                                                                                                                                                    | 1725.9              | 43           | 1.05 (0.75, 1.49) | 1725.9                           | 23                   | 0.99 (0.61, 1.61) |
| Former smokers, ≥ 25 years                                                                                                                                                                                                                                                                                                                    | 737.6               | 31           | 1.69 (1.13, 2.55) | 737.6                            | 17                   | 1.90 (1.08, 3.35) |
| Current smokers, < 25 years                                                                                                                                                                                                                                                                                                                   | 401.3               | 17           | 1.49 (0.88, 2.52) | 401.3                            | 8                    | 0.81 (0.40, 1.68) |
| Current smokers, ≥ 25 years                                                                                                                                                                                                                                                                                                                   | 1388.6              | 61           | 1.58 (1.16, 2.16) | 1388.6                           | 34                   | 1.50 (0.98, 2.29) |
| <b>Intensity of Smoking<sup>a</sup></b>                                                                                                                                                                                                                                                                                                       |                     |              |                   |                                  |                      |                   |
| Never smokers                                                                                                                                                                                                                                                                                                                                 | 6371.3              | 160          | Reference         | 6371.3                           | 101                  | Reference         |
| Former smokers, < 8 cigarettes/day                                                                                                                                                                                                                                                                                                            | 1175.2              | 37           | 1.21 (0.84, 1.76) | 1175.2                           | 21                   | 1.22 (0.75, 1.98) |
| Former smokers, ≥ 8 cigarettes/day                                                                                                                                                                                                                                                                                                            | 1288.3              | 37           | 1.26 (0.87, 1.83) | 1288.3                           | 19                   | 1.19 (0.69, 2.06) |
| Current smokers, < 8 cigarettes/day                                                                                                                                                                                                                                                                                                           | 856.3               | 30           | 1.38 (0.91, 2.07) | 856.3                            | 19                   | 1.36 (0.83, 2.24) |
| Current smokers, ≥ 8 cigarettes/day                                                                                                                                                                                                                                                                                                           | 933.6               | 48           | 1.68 (1.20, 2.35) | 933.6                            | 23                   | 1.23 (0.75, 2.02) |
| <b>Recency of cessation<sup>b</sup></b>                                                                                                                                                                                                                                                                                                       |                     |              |                   |                                  |                      |                   |
| Never smokers                                                                                                                                                                                                                                                                                                                                 | 5928                | 133          | Reference         | 5928                             | 81                   | Reference         |
| Current smokers                                                                                                                                                                                                                                                                                                                               | 1622.4              | 63           | 1.54 (1.13, 2.09) | 1622.4                           | 32                   | 1.20 (0.79, 1.84) |
| Former smokers, ≤10 years                                                                                                                                                                                                                                                                                                                     | 655                 | 20           | 1.27 (0.79, 2.05) | 655                              | 11                   | 1.26 (0.64, 2.51) |
| Former smokers, >10 years                                                                                                                                                                                                                                                                                                                     | 1545.3              | 44           | 1.24 (0.87, 1.77) | 1545.3                           | 23                   | 1.22 (0.74, 2.00) |
| HR = Hazard Ratio, 95% CI = 95% Confidence Interval                                                                                                                                                                                                                                                                                           |                     |              |                   |                                  |                      |                   |
| <sup>a</sup> Cox-proportional hazard models adjusted for age at diagnosis, tumor stage, body mass index (BMI), alcohol consumption, education, household income, marital status, menopausal status, and physical activity. Competing risk models (Fine and Gray subdistribution hazard model) were used for breast cancer-specific mortality. |                     |              |                   |                                  |                      |                   |

<sup>b</sup> Cox-proportional hazard models adjusted for age at diagnosis, tumor stage, waist to hip ratio, history of diabetes, history of hypertension, education, household income, and physical activity. Competing risk models (Fine and Gray subdistribution hazard model) were used for breast cancer-specific mortality
