# Supplementary material
Source: PubMed Central journal article supplement (PMC10408268)
Supplement: jamanetwopen-e2252371-s002.pdf [file jamanetwopen-e2252371-s002.pdf]

## Data Sharing Statement

Zeinomar. Association of Cigarette Smoking and Alcohol Consumption With Subsequent Mortality Among Black Breast Cancer Survivors in New Jersey. *JAMA Netw Open*. Published January 24, 2023. doi:10.1001/jamanetworkopen.2022.52371

### Data

**Data available:** Yes

**Data types:** Other (please specify)

**Additional Information:** The de-identified data underlying this article can be shared upon approval of a data request form by the Women's Circle of Health Follow-up Study Scientific Committee and with appropriate human subjects approval and data transfer agreements.

**How to access data:** [wchstudy@cinj.rutgers.edu](mailto:wchstudy@cinj.rutgers.edu)

**When available:** With publication

### Supporting Documents

**Document types:** None

### Additional Information

**Who can access the data:** Researchers whose proposed use of the data has been approved.

**Types of analyses:** For approved analyses

**Mechanisms of data availability:** With a signed data access agreement.
